# Supplementary material
Source: Springer Nature journal article supplement (https://www.springermedizin.de/resource/supplementary/13584_2012_41_MOESM6_ESM.pdf/9676844)

■ Circulatory 
 ■ Cancer 
 ■ Infectious diseases 
 ■ Genitourinary 
 ■ Perinatal/congenital 
 ■ Other

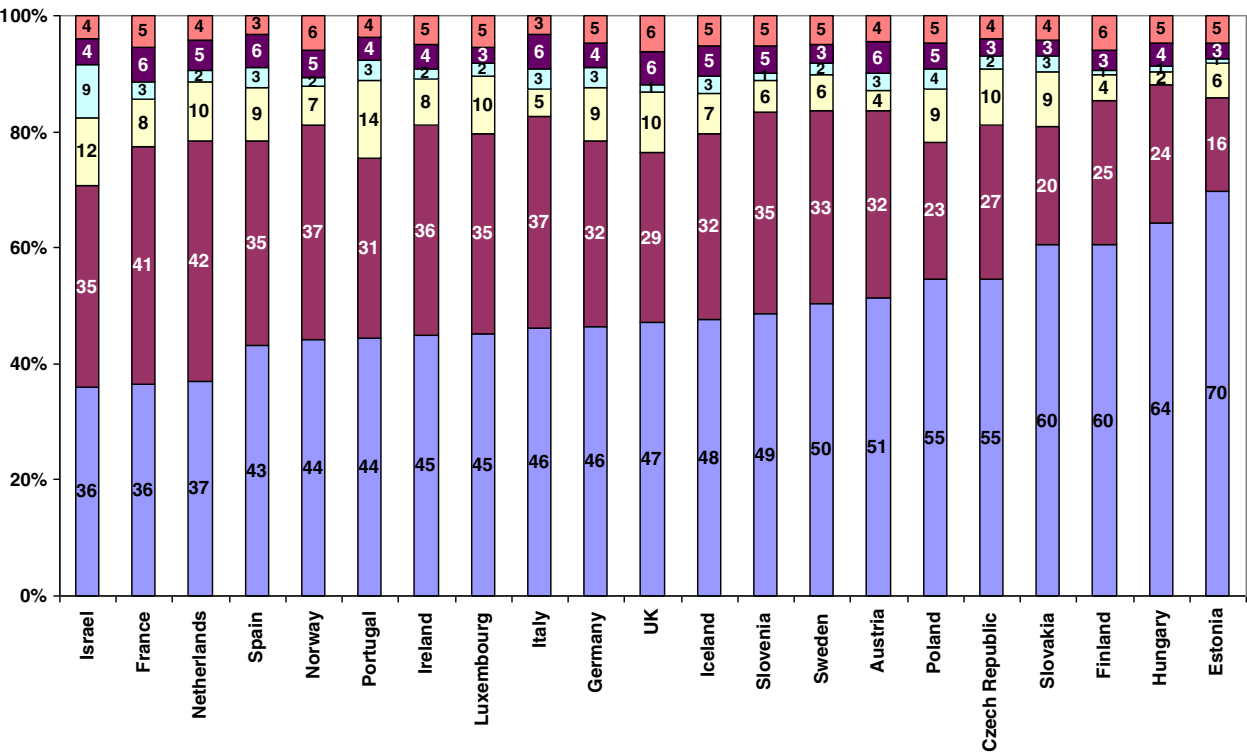

Supplement: MOESM6 [file 9676844]
